# Supplementary material for: Anticancer luminescent gold quantum clusters for in situ cancer-selective marking-imaging-targeting
Source: Royal Society of Chemistry journal article supplement (doi:10.1039/c7nr02229h), 2017-01-01
Supplement: c7nr02229h1.pdf [file c7nr02229h1.pdf]

**Electronic Supplementary Information**

**Anticancer Luminescent Gold Quantum Clusters for *In Situ* Cancer-Selective  
Marking-Imaging-Targeting**

*Jeong-Hwan Kim,<sup>1\*</sup> Haruki Eguchi,<sup>2</sup> and Yoshihiro Ishikawa<sup>1</sup>*

<sup>1</sup>Cardiovascular Research Institute, Yokohama City University, Graduate School of Medicine, Yokohama,  
236-0004, Japan.

<sup>2</sup>Advanced Applied Science Department, Research Laboratory, IHI Corporation, Yokohama, 235-8501,  
Japan.

Email: [jeongkim@yokohama-cu.ac.jp](mailto:jeongkim@yokohama-cu.ac.jp)

This material includes **Fig. S1-S13**.

[Insert Running title of <72 characters]

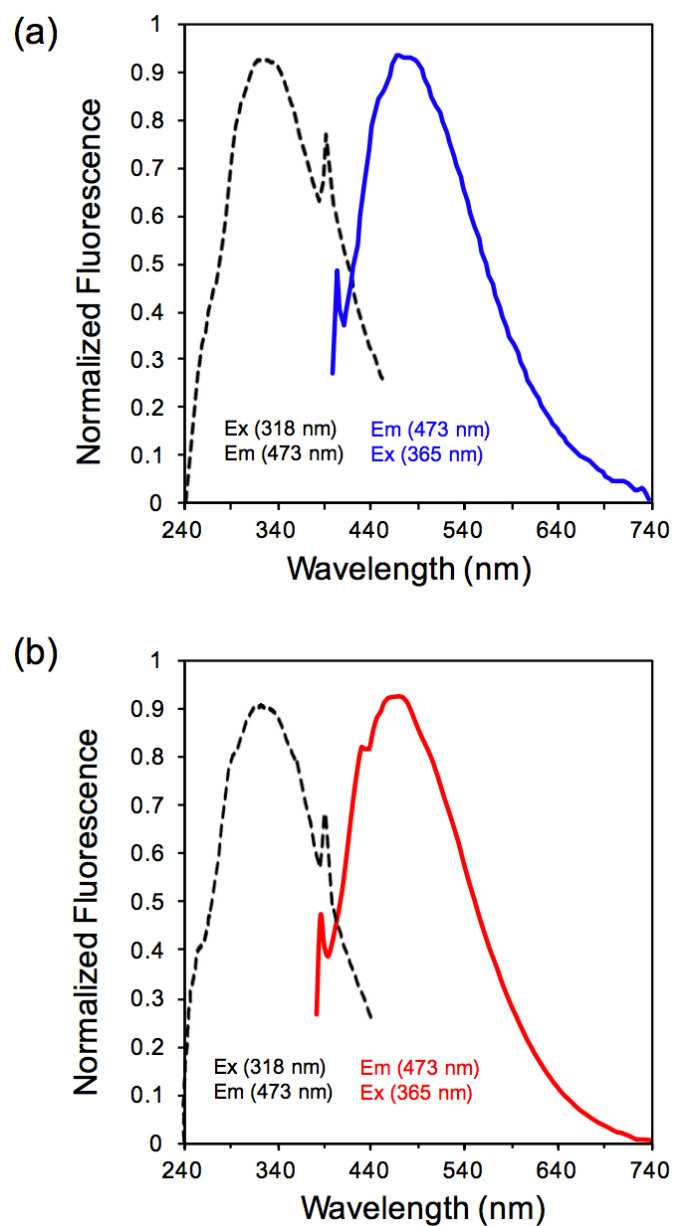

**Fig. S1** Normalized fluorescence spectra of (a) Au(en)QC and (b) Tf-Au(en)QC samples, showing identical excitation and emission peaks.

[Insert Running title of <72 characters]

1

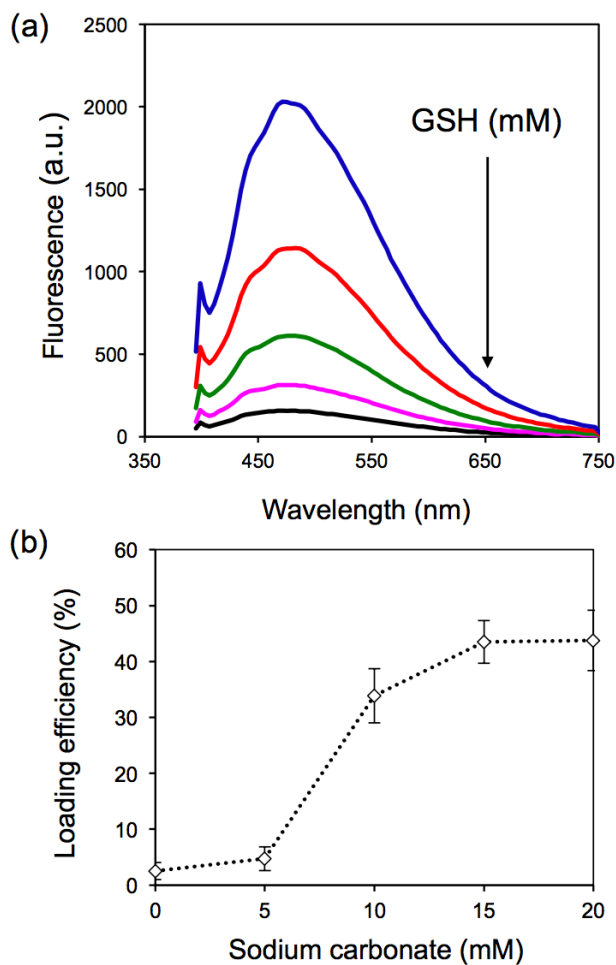

2

3 **Fig. S2** (a) Fluorescence spectra of Au(en)QC samples as a function of GSH  
4 concentration, 0, 5, 10, 15, 20 mM (top to bottom). (b) Sodium carbonate-dependent  
5 loading efficiency of Au(en)QCs in Tf-Au(en)QC complex.

6

7

8

9

[Insert Running title of <72 characters]

1

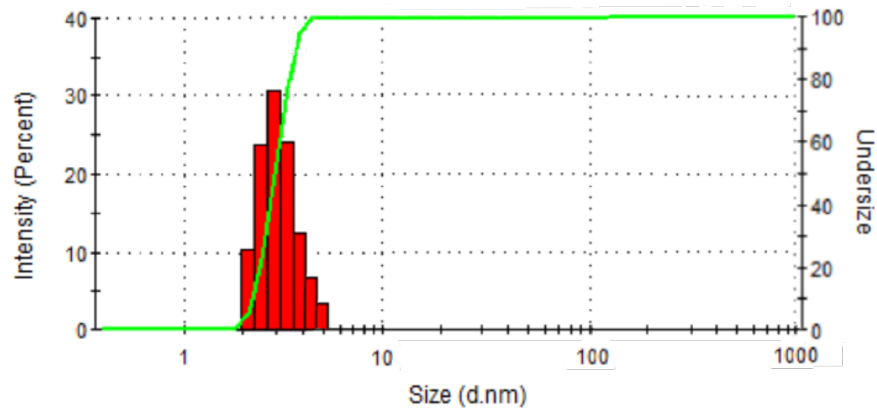

2

3 **Fig. S3** DLS size distribution of Bt-AuNPs in DCM solution, showing the hydrodynamic  
 4 diameter of  $3.08 \pm 1.1$  nm. The polydispersity index (PDI) is 0.18.

5

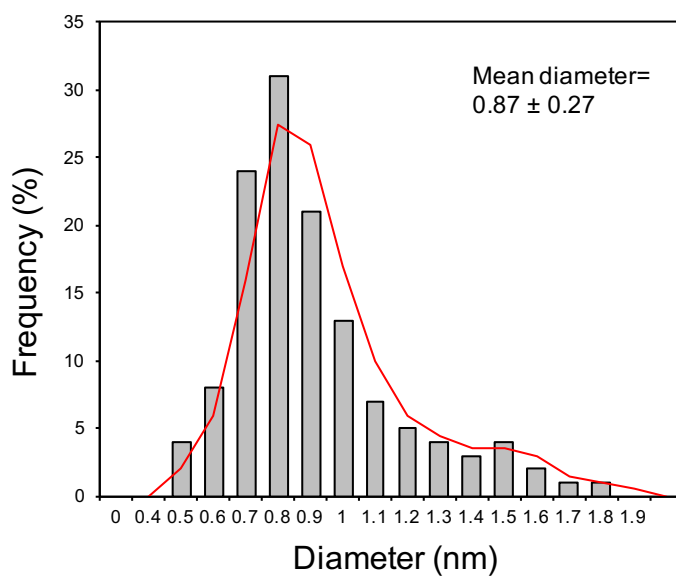

6

7 **Fig. S4** Particle size distribution histogram acquired from HRTEM image analysis of  
 8 Au(en)QC samples

9

[Insert Running title of <72 characters]

1

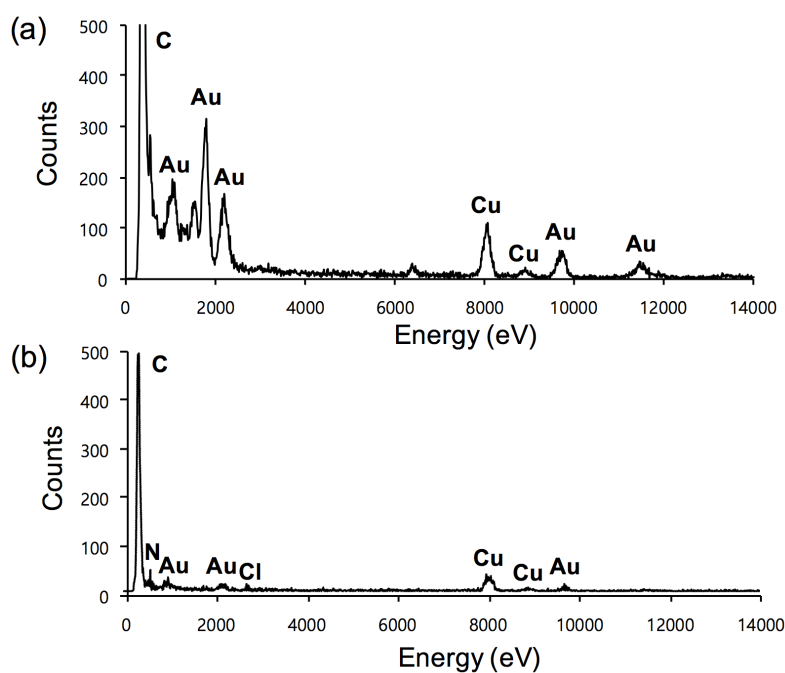

2

3 **Fig. S5** Energy-dispersive X-ray (EDX) spectra of (a) Butanethiol-AuNPs and (b)  
4 Au(en)QCs.

5

6

7

8

9

10

11

12

13

[Insert Running title of <72 characters]

1

2

3

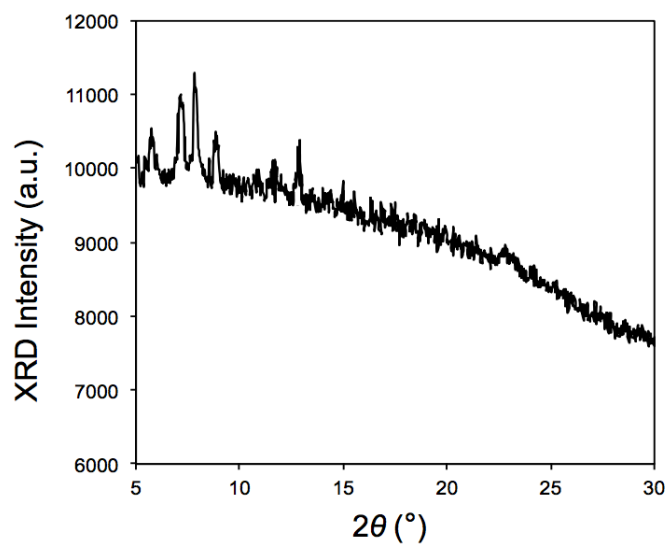

4

5

**Fig. S6** Powder XRD pattern of Au(en)QC sample

6

7

8

9

10

11

12

13

14

[Insert Running title of <72 characters]

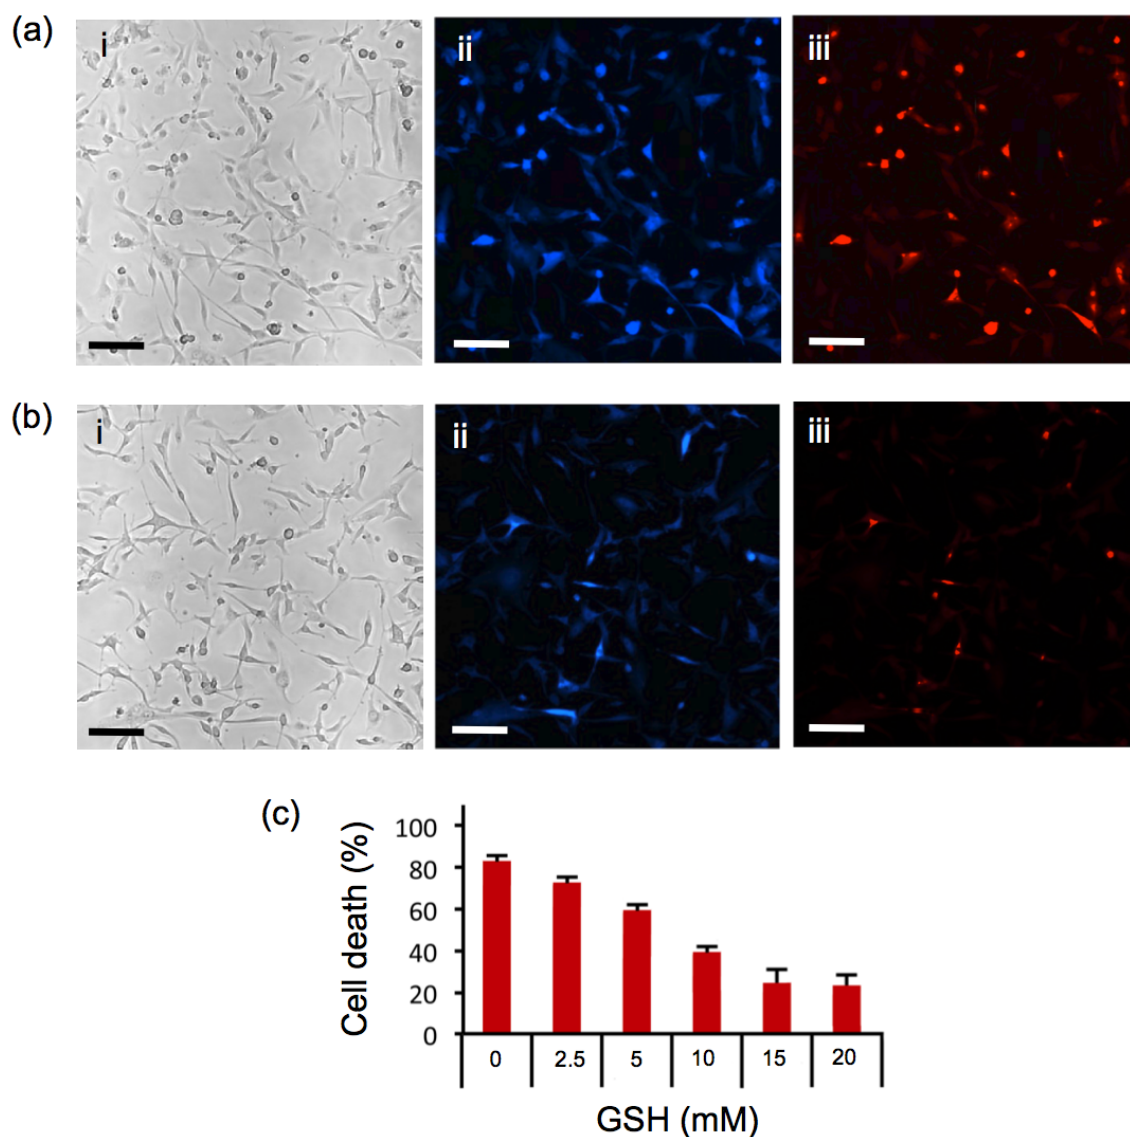

**Fig. S7** Effect of GSH on cytotoxicity of Au(en)QCs. Confocal microscopic images of A2780 cells after incubation with 20  $\mu$ M Au(en)QCs for 24 h, in the (a) absence/ (b) presence of 20 mM GSH. (i) Bright field, (ii) DAPI, and (iii) PI modes were shown. (c) XTT assay. Scale bar: 200  $\mu$ m.

[Insert Running title of <72 characters]

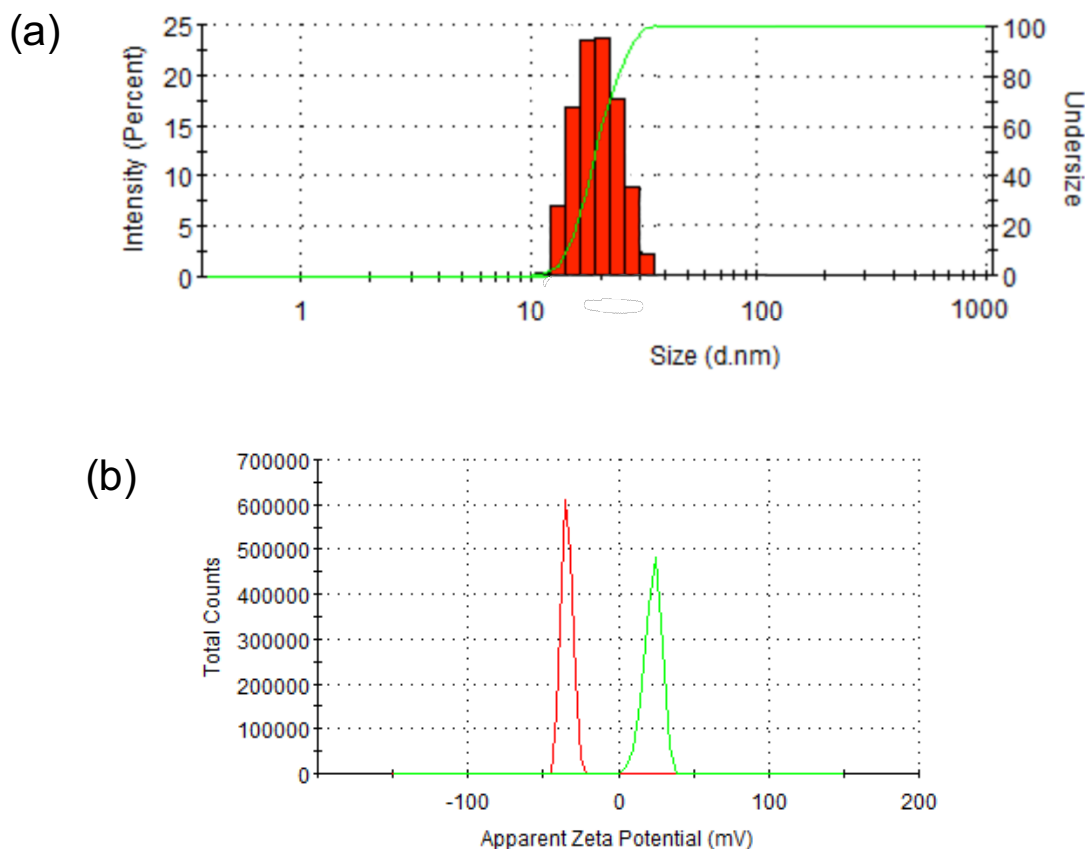

**Fig. S8** (a) DLS size distribution of Tf-Au(en)QC solution (the polydispersity index (PDI) is 0.24) and (b) the colloidal stability determination of Au(en)QCs (green peak) and Tf-Au(en)QCs (red peak) by zeta potential analysis.

1  
2  
3  
4

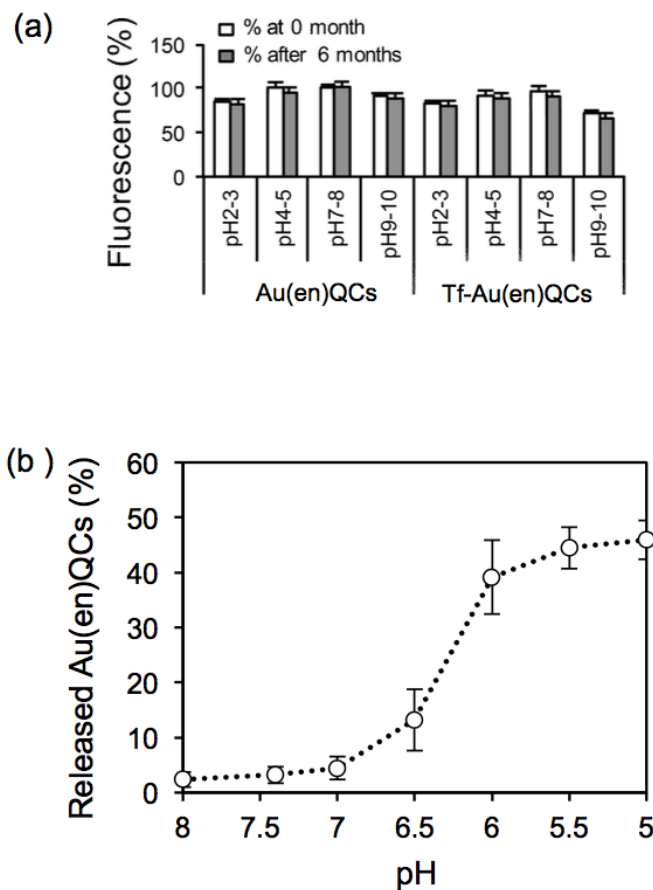

5  
6  
7  
8  
9  
10  
11  
12

**Fig. S9** (a) pH-dependent photostability of Au(en)QCs and Tf-Au(en)QCs before and after 6 months. (b) pH-dependent release profile of Au(en)QCs from Tf-Au(en)QCs.

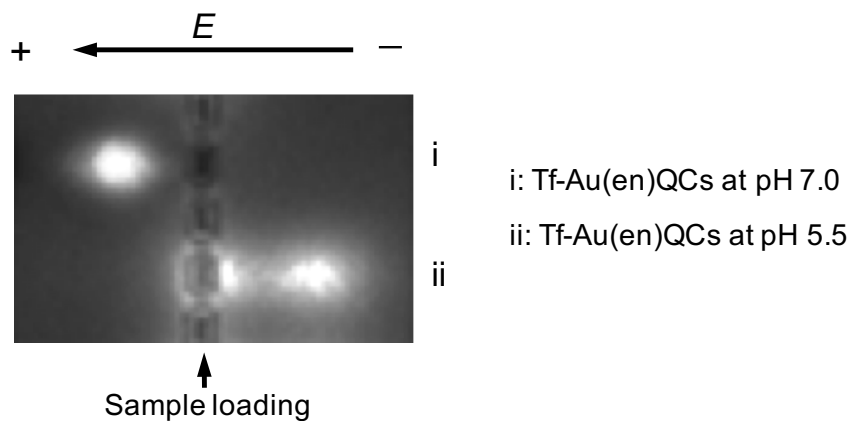

3

4 **Fig. S10** Gel electrophoretic analysis of the Tf-Au(en)QC samples at different

5 biological pH, which displayed the dissociation of Au(en)QCs from the Tf-Au(en)QC

6 complexes at pH 5.5

7

8

1  
2

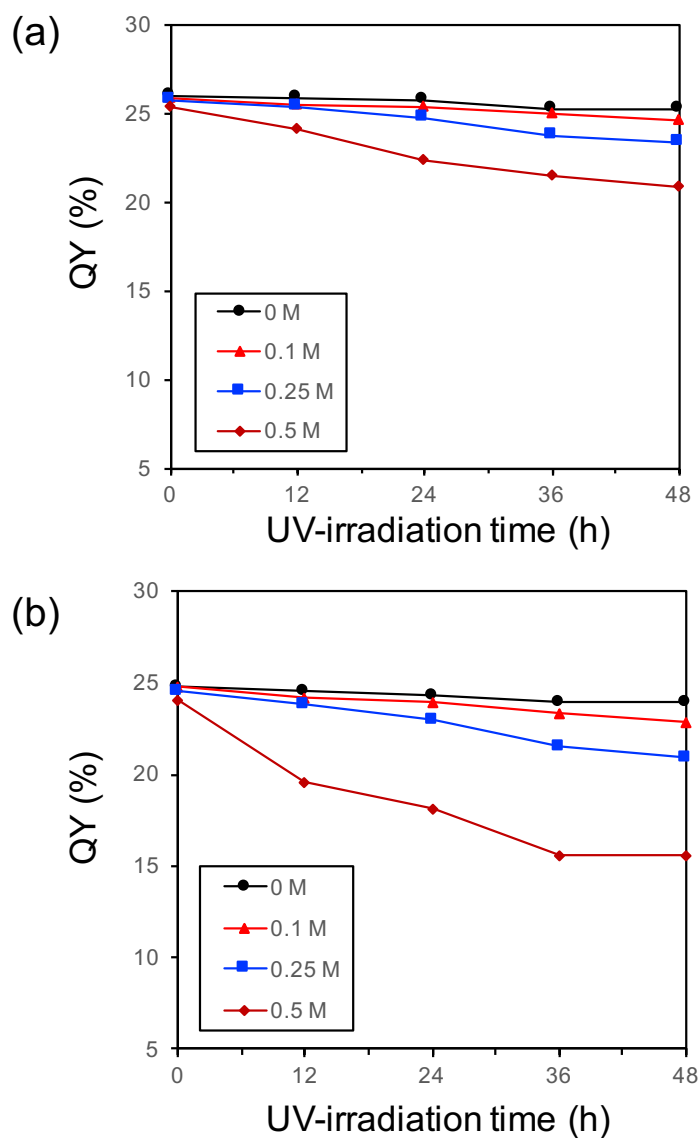

3

4 **Fig. S11** Effect of salt and photoirradiation on colloidal stability of (a) AuQCs and (b) Tf-  
5 AuQCs for 2 days. The QY levels were measured by PL-spectroscopy at  $\lambda_{em, max}=473$   
6 nm in the absence/presence of NaCl, as a function of time under an UV-lamp (365 nm).

7  
8

[Insert Running title of <72 characters]

1

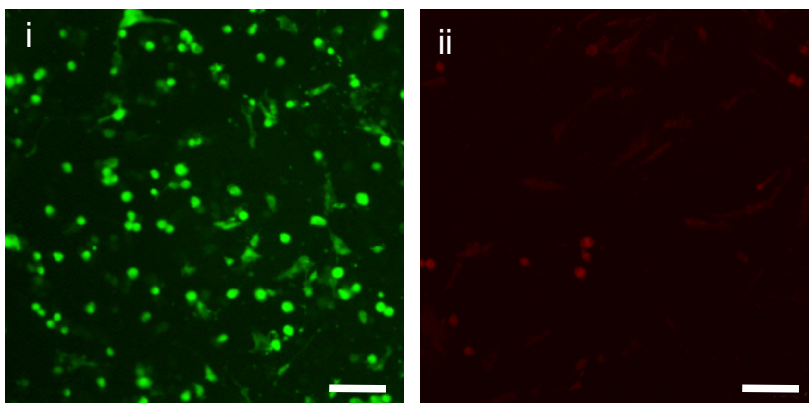

2

3 **Fig. S12** Live/dead cancer cell imaging to examine effect of an excessive apo-Tf  
4 proteins (40  $\mu$ M) as a control experiment: The cells were treated only with free apo-Tf  
5 proteins without adding Tf-Au(en)QCs. Microscopic images of viable ovarian  
6 carcinoma cells (A2780) stained with calcein AM (i) and PI (ii), showing no evident  
7 dead cells. Scale: 200  $\mu$ m.

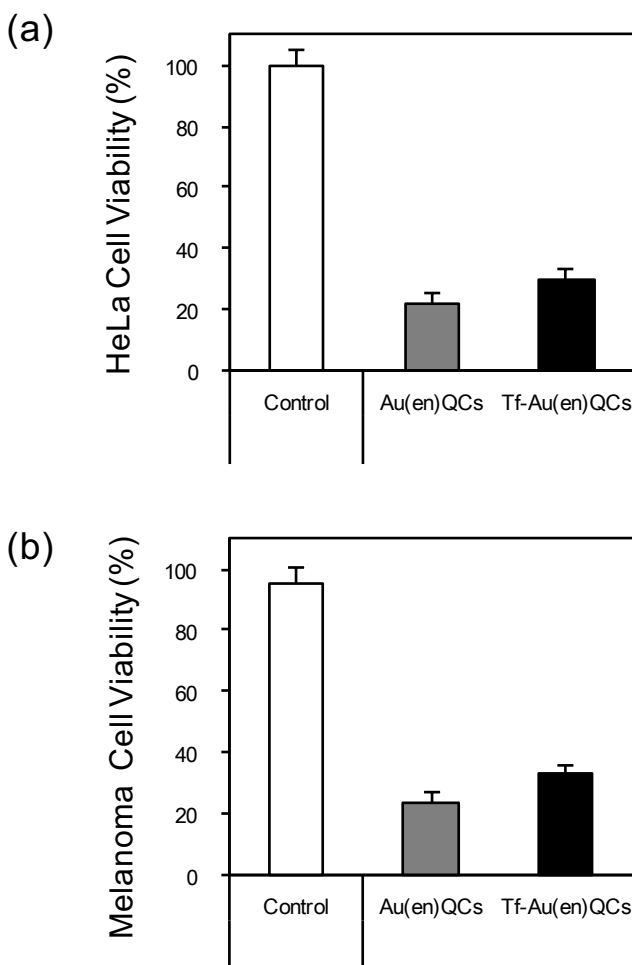

**Fig. S13** XTT assays of Au(en)QC and Tf-Au(en)QC samples over (a) HeLa and (b) human melanoma cancer cells.
